# Supplementary material for: Significance of depth of invasion determined by MRI in cT1N0 tongue squamous cell carcinoma
Source: PubMed Central journal article supplement (PMC7070144; doi:10.1038/s41598-020-61474-5), 2020-03-13
Supplement: 41598_2020_61474_MOESM1_ESM.pdf [file 41598_2020_61474_MOESM1_ESM.pdf]

**Significance of depth of invasion determined by MRI in cT1N0 tongue squamous  
cell carcinoma**

Chunmiao Xu <sup>1,#</sup>, Junhui Yuan <sup>1,#</sup>, Liuqing Kang <sup>1</sup>, Xiaoxian Zhang <sup>1</sup>, Lifeng Wang <sup>1</sup>  
Xuejun Chen<sup>1</sup>, Qi Yao <sup>1</sup>, Hailiang Li <sup>1,\*</sup>

1 Department of Radiology, Affiliated Cancer Hospital of Zhengzhou University,  
Henan Cancer Hospital, Zhengzhou, Henan, PR China

#: The first two authors make the same contribution

\*: Corresponding author at: Department of Radiology, Affiliated Cancer Hospital of  
Zhengzhou University, Henan Cancer Hospital, Zhengzhou, Henan, PR China. Tel:  
37165588452; Fax: 8665587222; Email: [xuchunmiao456@sina.com](mailto:xuchunmiao456@sina.com)

Supply table: Tumor stage change according to the different classification system

| Tumor stage | 7 <sup>th</sup> AJCC classification | 8 <sup>th</sup> AJCC classification |
|-------------|-------------------------------------|-------------------------------------|
| T1          | 151                                 | 111                                 |
| T2          | 0                                   | 40                                  |
